# Supplementary material
Source: MDPI journal article supplement (https://www.mdpi.com/2306-5338/6/4/92)
Supplement: s1 [file s1]

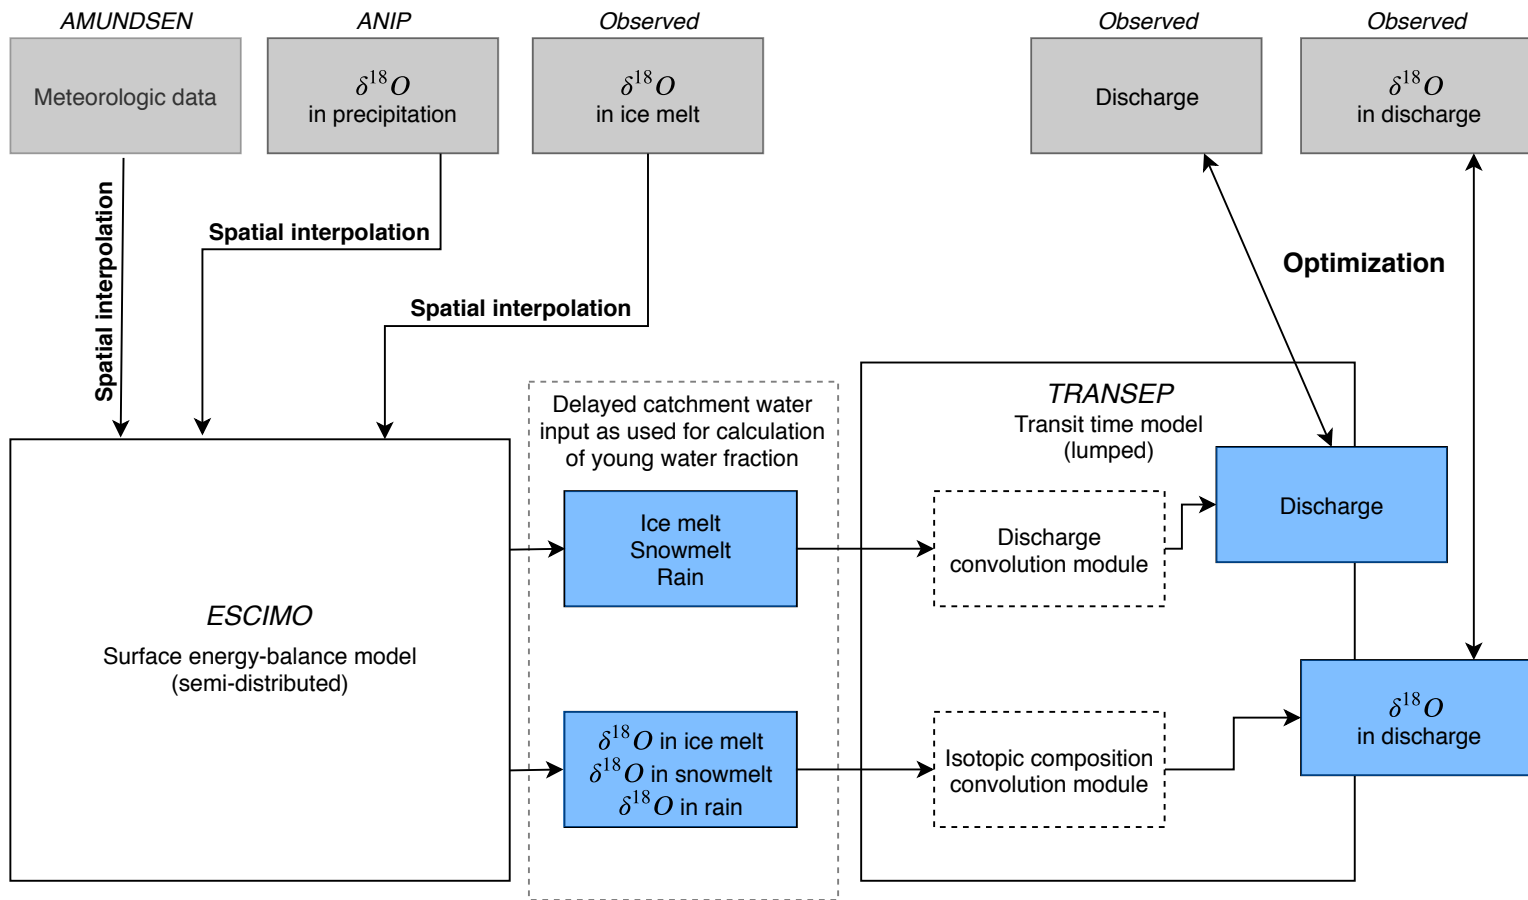

**Figure S2:** Overview scheme of modelling workflow. The grey boxes represent data used for model input, the blue boxes represent model output data and the white boxes are the models used in this study.
