# Supplementary material
Source: MDPI journal article supplement (https://www.mdpi.com/2306-5338/6/4/92)

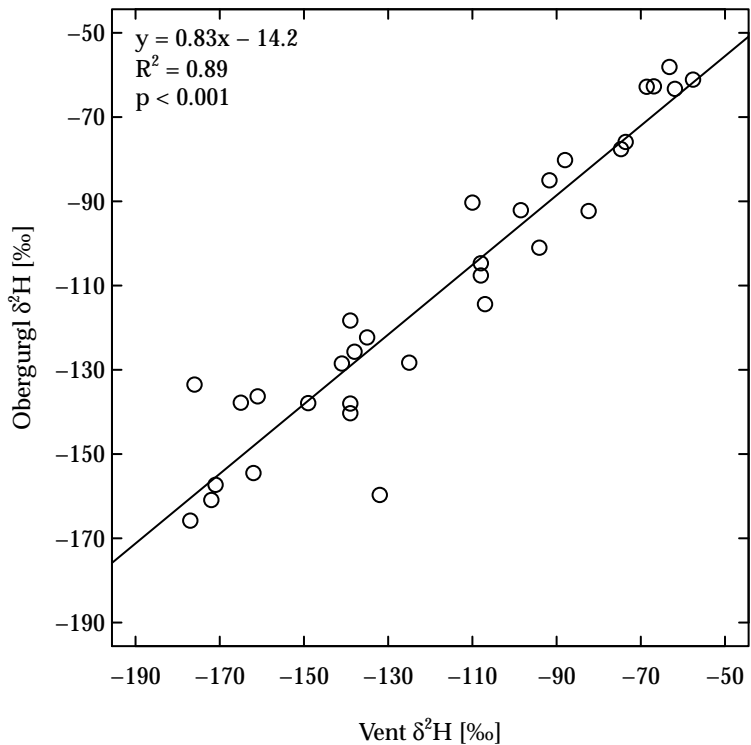

Supplement: s1 [file s1]
